# Supplementary material
Source: PubMed Central journal article supplement (PMC4909356)
Supplement: NIHMS789545-supplement-01.pdf [file NIHMS789545-supplement-01.pdf]

## SUPPLEMENTAL FIGURE 1

## Niche specificity of the placental microbiome

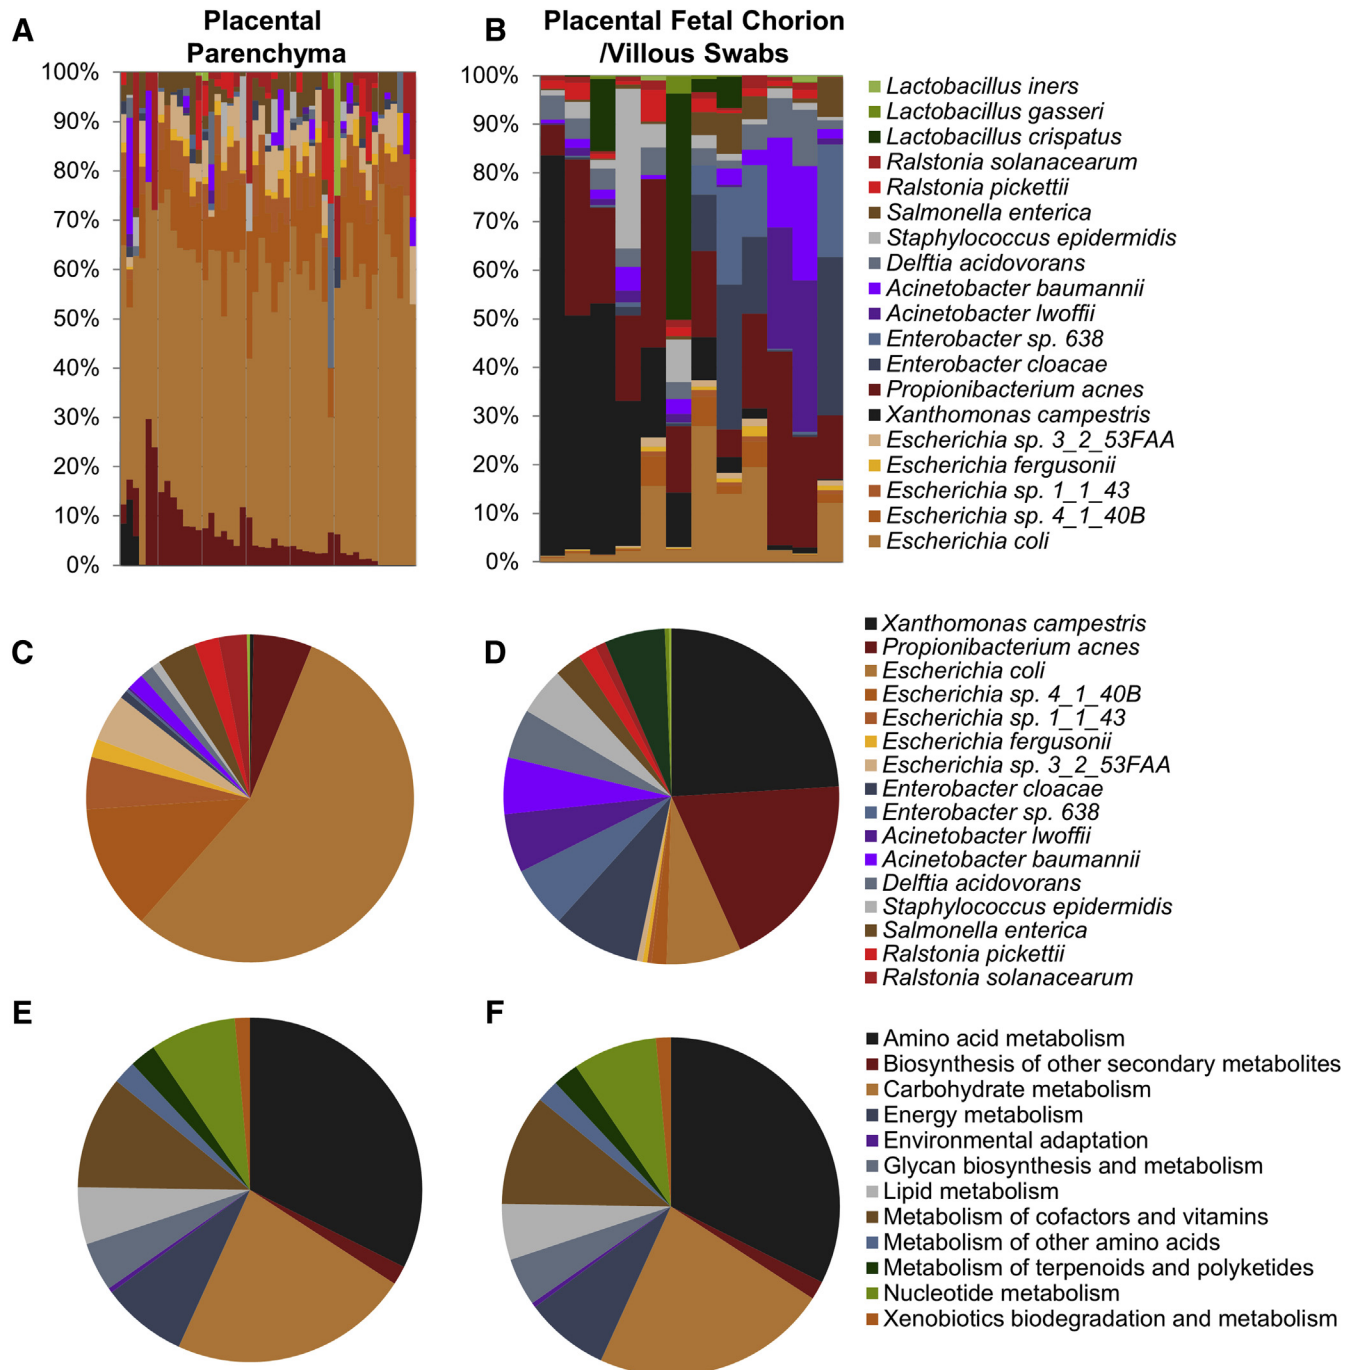

**A–D,** Bacterial taxa and **E–F,** metabolic pathways were compared between our previous cohort examining the placental parenchyma microbiome and our current study examining the placental membrane microbiome. **A,** When examining individual subjects, we find that the placental parenchyma microbiome has a high abundance of *Escherichia coli*. **B,** Although the placental membrane microbiome also had a high abundance of *E. coli*, *Xanthomonas campestris*, *Propionibacterium acnes*, and *Lactobacillus* species also were highly prevalent in the placental membrane microbiome. **C–D,** Overall abundance comparison of pie charts reflects similar results to individual bar plots in **A–B**. **E–F,** Despite some differences in overall bacterial taxa, inferred metabolic pathways are remarkably similar between the 2 placental sites.

Prince et al. Placental microbiota and their metabolic pathways in PTB and chorioamnionitis. Am J Obstet Gynecol 2016.

**SUPPLEMENTAL FIGURE 2**  
**Beta diversity of subjects cluster independent from mode of delivery**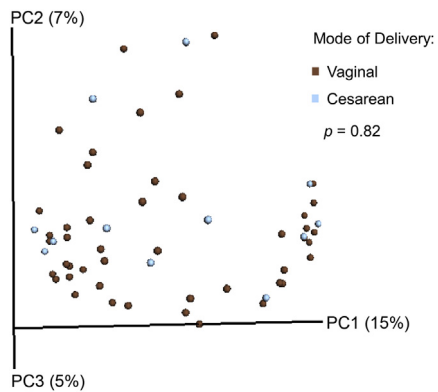

PCoA plot of all subjects (both term and preterm) demonstrate that clustering of beta diversity is independent of mode of delivery ( $P = .82$  by PERMANOVA, *brown*: vaginal delivery, *blue*: cesarean delivery).

PCoA, principal coordinates analysis; PERMANOVA, permutational multivariate analysis of variance.

Prince et al. Placental microbiota and their metabolic pathways in PTB and chorioamnionitis. *Am J Obstet Gynecol* 2016.
